# Supplementary material
Source: HighWire-hosted journal article supplement (https://erj.ersjournals.com/content/58/5/2101840)
Supplement: inline-supplementary-material-1 [file inline-supplementary-material-1.pdf]

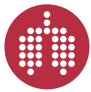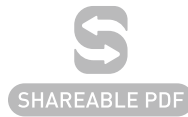

# SPLUNC1 is a novel marker of disease severity and airway infection in bronchiectasis

Holly R. Keir<sup>1</sup>, Amelia Shoemark <sup>1,2</sup>, Jeffrey T.J. Huang<sup>3</sup> and James D. Chalmers<sup>1</sup>

<sup>1</sup>Division of Molecular and Clinical Medicine, University of Dundee, Ninewells Hospital and Medical School, Dundee, UK. <sup>2</sup>Royal Brompton Hospital, Primary Ciliary Dyskinesia Centre, Paediatric Respiratory Medicine, London, UK. <sup>3</sup>TMRC Laboratory, University of Dundee, Dundee, UK.

Corresponding author: James D. Chalmers ([jchalmers@dundee.ac.uk](mailto:jchalmers@dundee.ac.uk))

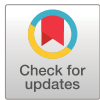

Shareable abstract (@ERSpublications)

Having been shown to be a biomarker of severity in cystic fibrosis, this study shows SPLUNC1 is also a novel marker of severity and lung infections in non-CF bronchiectasis <https://bit.ly/3ABzEdc>

**Cite this article as:** Keir HR, Shoemark A, Huang JTJ, *et al.* SPLUNC1 is a novel marker of disease severity and airway infection in bronchiectasis. *Eur Respir J* 2021; 58: 2101840 [DOI: 10.1183/13993003.01840-2021].

This single-page version can be shared freely online.

Copyright ©The authors 2021.  
For reproduction rights and  
permissions contact  
[permissions@ersnet.org](mailto:permissions@ersnet.org)

Received: 30 June 2021  
Accepted: 5 Aug 2021

*To the Editor:*

Biomarkers of disease severity are urgently needed to guide precision medicine in airway diseases [1, 2].
